# Supplementary material
Source: PubMed Central journal article supplement (PMC8898288)
Supplement: NIHMS1775082-supplement-1.pdf [file NIHMS1775082-supplement-1.pdf]

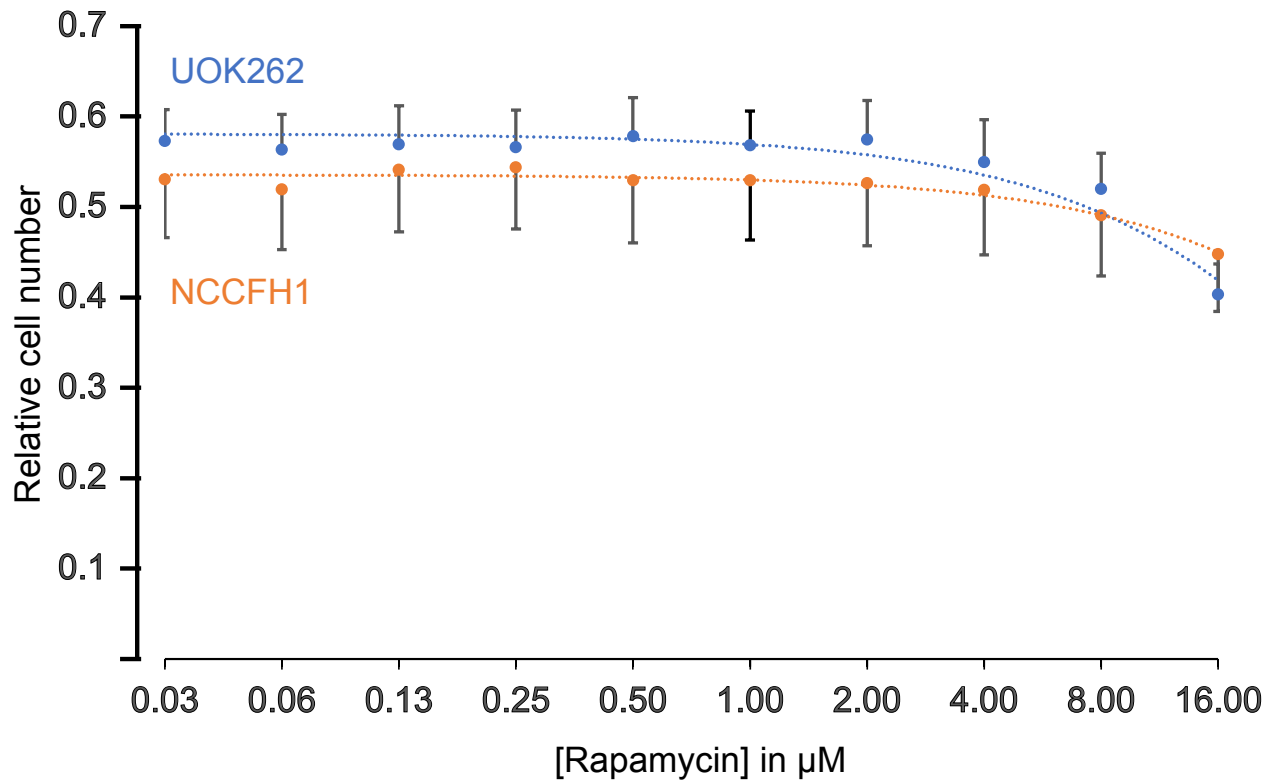

**Figure S1. Rapamycin dose response curves for UOK262 and NCCFH1 cell line.** UOK262 and NCCFH1 cells were grown in increasing concentration of rapamycin for 48 hours. The number of viable cells was determined by an MTS assay. Both cell lines were relatively resistant to rapamycin across the tested concentration range.
