# Supplementary material
Source: PubMed Central journal article supplement (PMC8898288)
Supplement: NIHMS1775082-supplement-2.pdf [file NIHMS1775082-supplement-2.pdf]

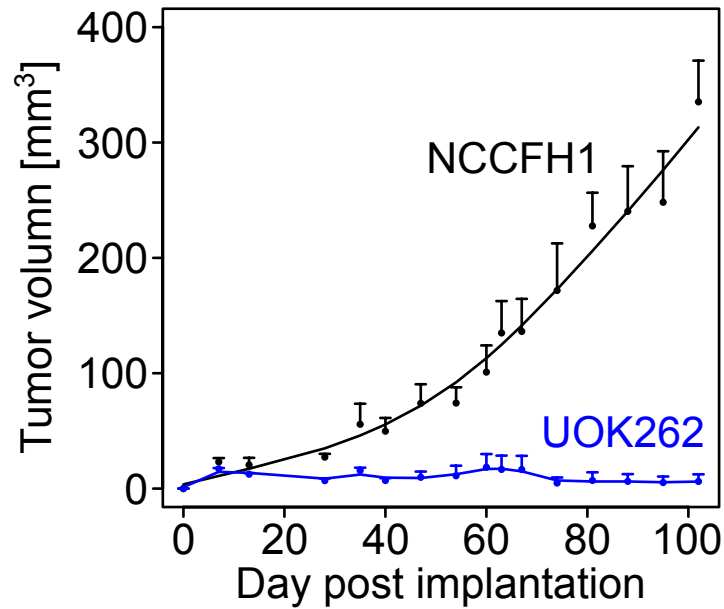

**Figure S2. NCCFH1 cells are more tumorigenic than UOK262 cells.** Ten million NCCFH1 or UOK262 cells suspended in PBS:Matrigel (1:1) were injected into the flank region of a NSG mouse (3 mice per group). Tumor lengths and widths were measured using a digital caliper. Tumor volumes were calculated as  $0.5 \times \text{length} \times \text{width}^2$ . Black line represents tumor volumes measured from mice injected with NCCFH1 cells, while blue line represents tumor volumes measured from mice injected with UOK262 cells. Error bars represent standard error.
