# Supplementary material
Source: PubMed Central journal article supplement (PMC8898288)
Supplement: NIHMS1775082-supplement-4.pdf [file NIHMS1775082-supplement-4.pdf]

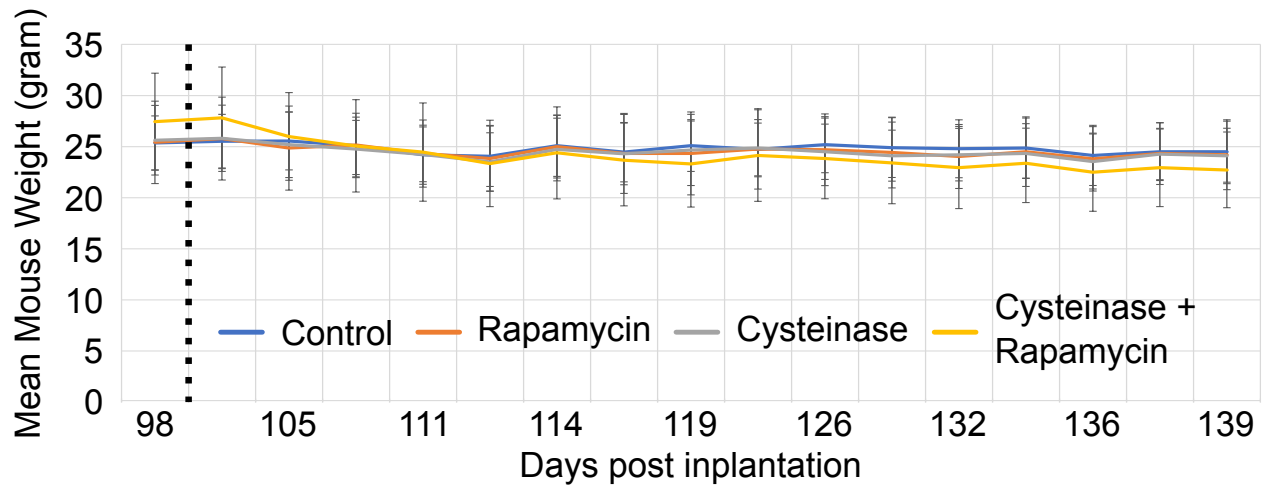

**Figure S3. Mean mouse bodyweight following the treatment.** Mouse bodyweight was measured twice a week using a digital scale. Dotted line represents treatment start date. Error bars represent standard deviation within each group.
