# Supplementary material
Source: PubMed Central journal article supplement (PMC8898288)
Supplement: NIHMS1775082-supplement-5.pdf [file NIHMS1775082-supplement-5.pdf]

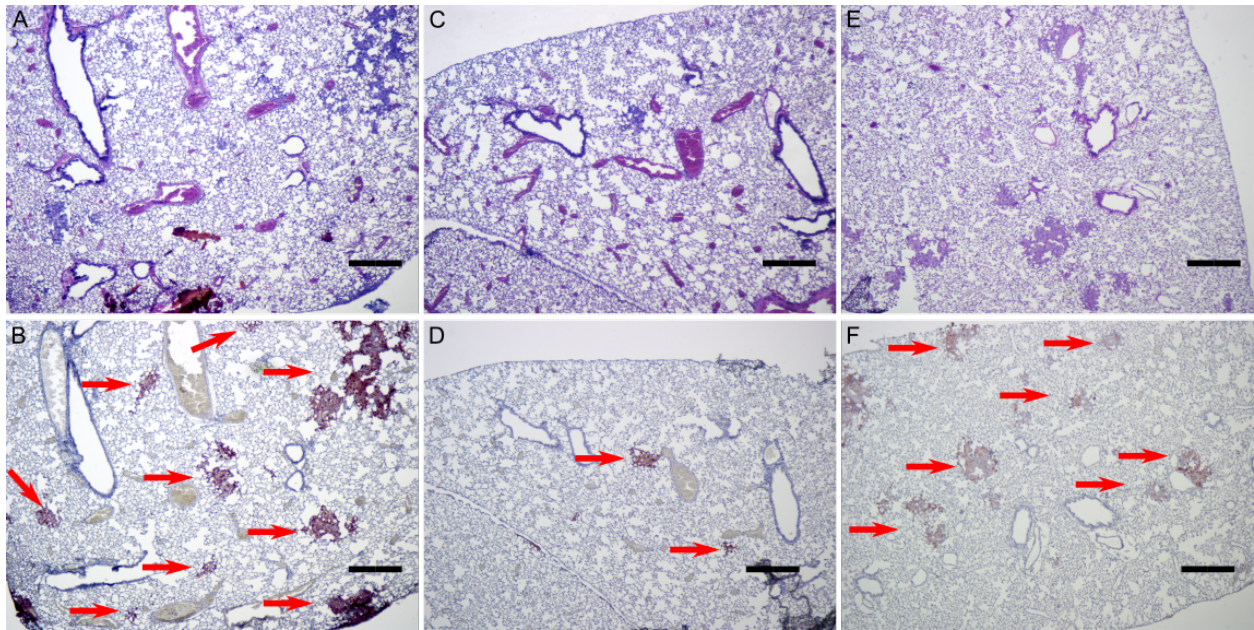

**Figure S4. Representative lung metastases observed in some mice in the Control, Cysteinase, and the Rapamycin treatment groups.** **A.** H&E staining of lung from a representative mouse in the control group. **B.** Immunohistochemical staining for 2-SC detected multiple lung metastases in the consecutive lung tissue section. **C & D.** H&E and 2-SC IHC staining of lung metastases in a representative mouse from the Cysteinase treatment group. **E & F.** H&E and 2-SC IHC staining of lung metastases in a mouse from the Rapamycin treatment group. Scale bar = 400 $\mu$ m, red arrows are pointing to 2-SC positive stained tumor cells.
